# Supplementary material for: Integration of Data-Dependent Acquisition (DDA) and Data-Independent High-Definition MSE (HDMSE) for the Comprehensive Profiling and Characterization of Multicomponents from Panax japonicus by UHPLC/IM-QTOF-MS
Source: MDPI journal article supplement (doi:10.3390/molecules24152708), 2019-07-25
Supplement: s1 [file s1]

## Electronic Supplementary Materials

### **Integration of data-dependent acquisition (DDA) and data-independent high-definition MS<sup>E</sup> (HDMS<sup>E</sup>) for the comprehensive profiling and characterization of multicomponents from *Panax japonicus* by UHPLC/IM-QTOF-MS**

Chunxia Zhang <sup>1,2,†</sup>, Tiantian Zuo <sup>1,2,†</sup>, Xiaoyan Wang <sup>1,2,†</sup>, Hongda Wang <sup>1,2</sup>, Ying Hu <sup>1,2</sup>, Zheng Li <sup>1,3</sup>, Weiwei Li <sup>1,2</sup>, Li Jia <sup>1,2</sup>, Yuexin Qian <sup>1,2</sup>, Wenzhi Yang <sup>1,2,\*</sup> and Heshui Yu <sup>1,3,\*</sup>

<sup>1</sup> Tianjin State Key Laboratory of Modern Chinese Medicine, Tianjin University of Traditional Chinese Medicine, 312 Anshanxi Road, Tianjin 300193, China

<sup>2</sup> Tianjin Key Laboratory of TCM Chemistry and Analysis, Tianjin University of Traditional Chinese Medicine, 312 Anshanxi Road, Tianjin 300193, China

<sup>3</sup> College of Pharmaceutical Engineering of Traditional Chinese Medicine, Tianjin University of Traditional Chinese Medicine, Tianjin 300193, China

\* Correspondence: [wzyang0504@tjutcm.edu.cn](mailto:wzyang0504@tjutcm.edu.cn), Tel.: +86-022-5979-1833 (W.Y.); [hs\\_yu08@163.com](mailto:hs_yu08@163.com) (H.Y.)

<sup>†</sup> These authors contributed equally to this work.

## Contents

**Figure S1** Comparison of the influence of formic acid (0.1% FA; **A**) or ammonium acetate (3 mM AA; **B**) as the additive in mobile phase on the resolution of multicomponents from an extract of *Panax japonicus*.

**Figure S2** Comparison of the influence of column temperature (25–40 °C) on the BEH Shield RP18 column for the resolution of ginsenosides from *Panax japonicus*.

**Figure S3** Illustration for the diversity of ginsenoside precursors in the negative ESI mode, using ginsenoside Ro as a case, a major OA-type saponin in *Panax japonicus*.

**Figure S4** A typical case of repeating acquisition of the MS<sup>2</sup> information for the isotope peak of the identified components by DDA listed as “Unknown Components”.

**Table S1** Information of 60 ginsenoside reference compounds used in this work.

**Table S2** Information of the 178 saponins identified in *Panax japonicus* by integrated analyses of the DDA and HDMS<sup>E</sup> data.

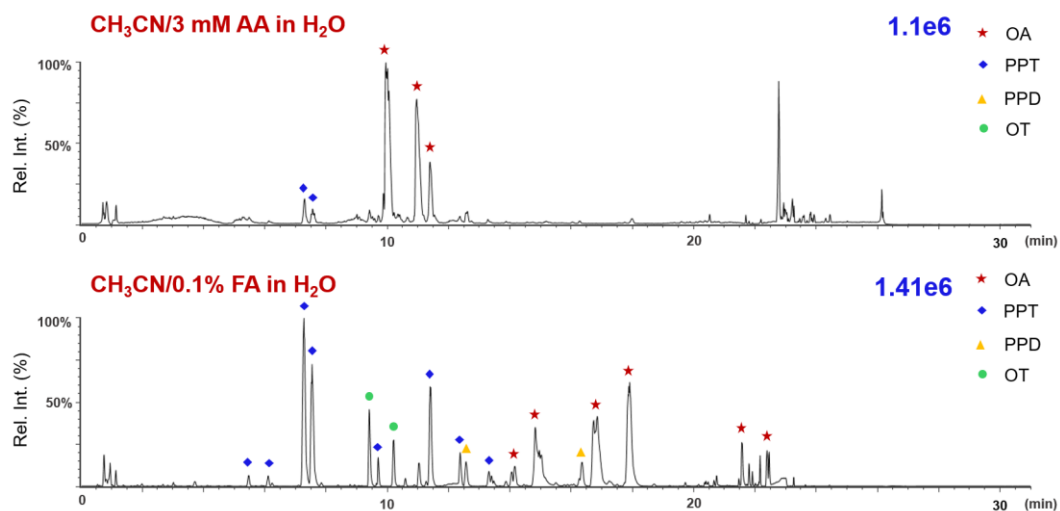

**Figure S1** Comparison of the influence of formic acid (0.1% FA; **A**) or ammonium acetate (3 mM AA; **B**) as the additive in mobile phase on the resolution of multicomponents from an extract of *Panax japonicus*.

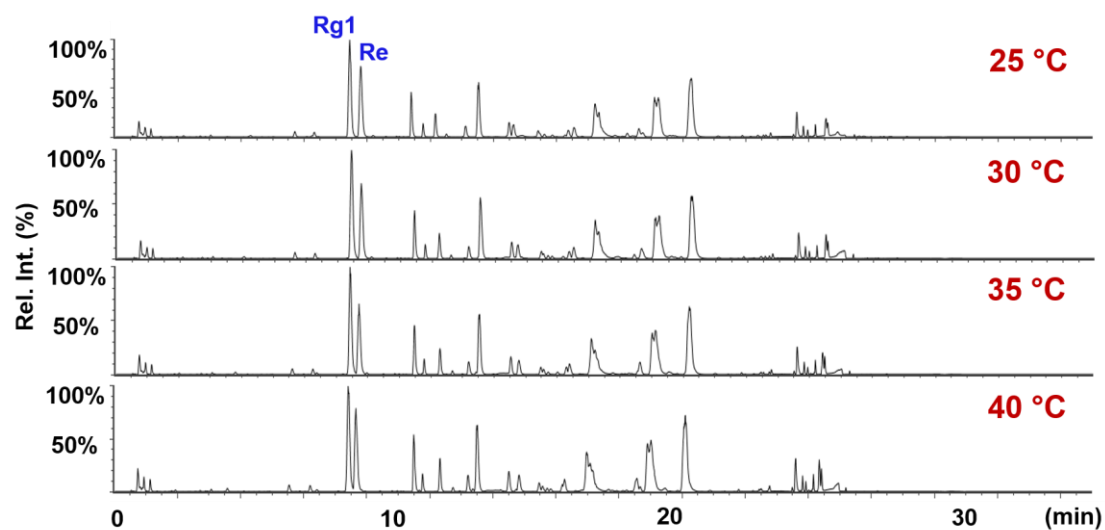

**Figure S2** Comparison of the influence of column temperature (25–40 °C) on the BEH Shield RP18 column for the resolution of ginsenosides from *Panax japonicus*.

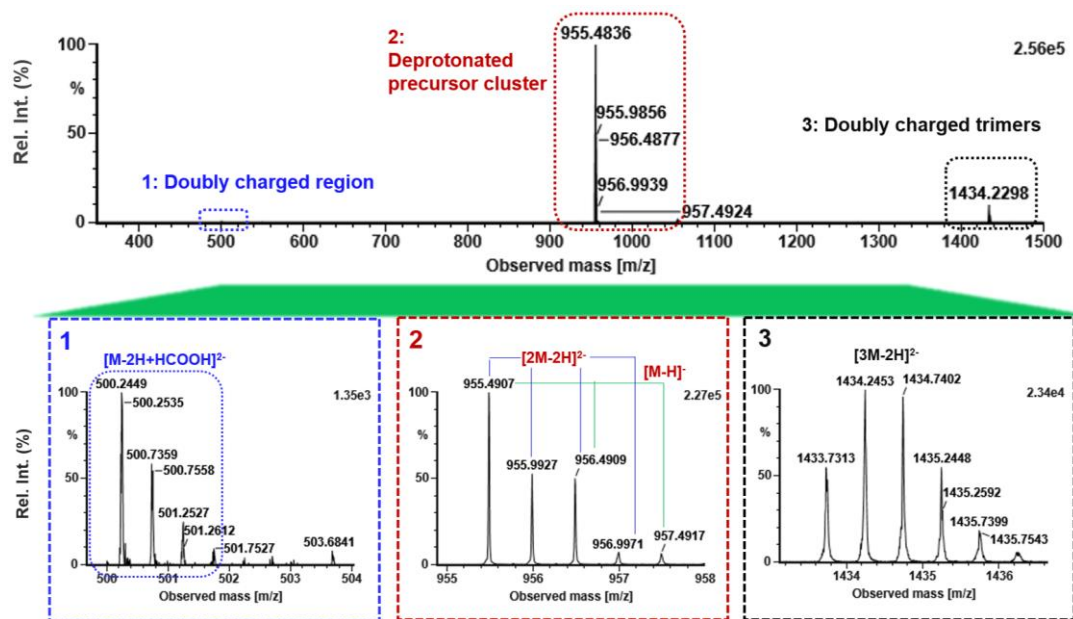

**Figure S3** Illustration for the diversity of ginsenoside precursors in the negative ESI mode, using ginsenoside Ro as a case, a major OA-type saponin in *P. japonicus*.

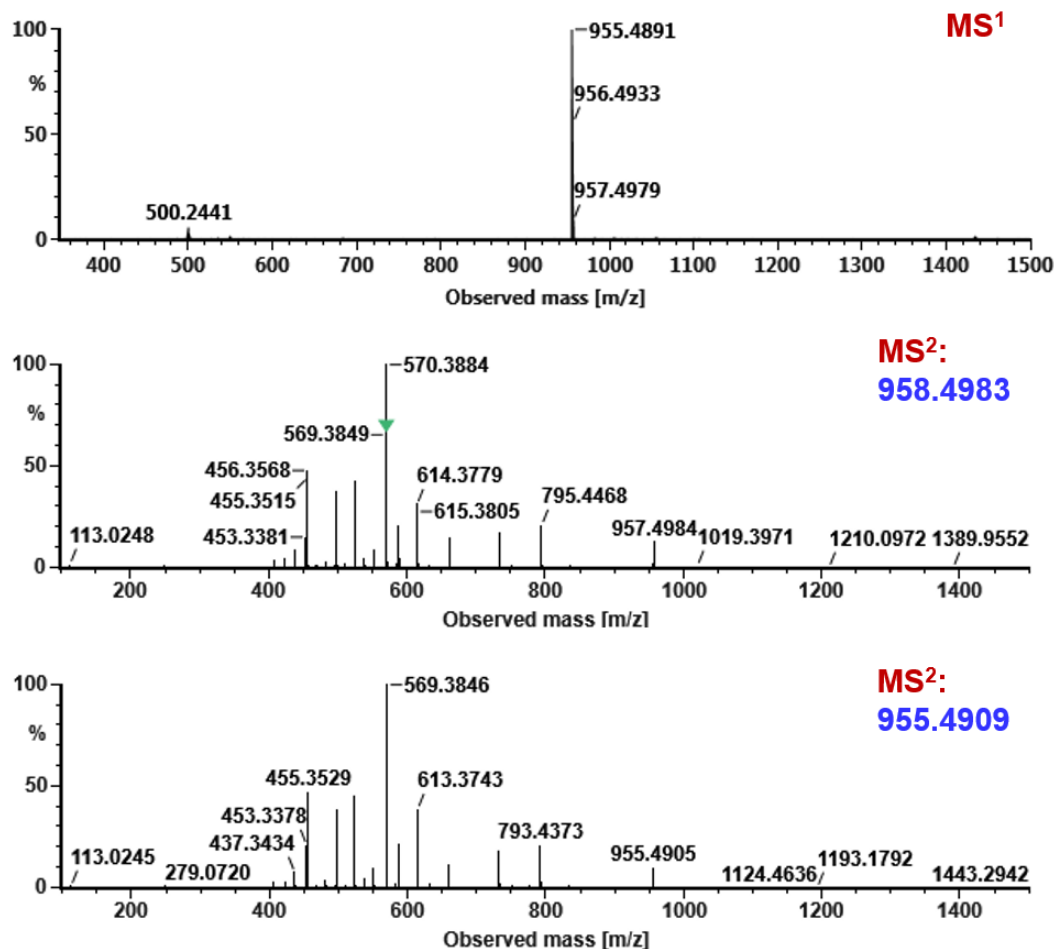

**Figure S4** A typical case of repeating acquisition of the MS<sup>2</sup> information for the isotope peak of the identified components by DDA listed as “Unknown Components”.

**Table S1** Information of 60 ginsenoside reference compounds used in this work.

| No. | Compound                             | M.F.                                            | Exact mass | Subclass |
|-----|--------------------------------------|-------------------------------------------------|------------|----------|
| 1   | 20( <i>S</i> )-protopanaxatriol      | C <sub>30</sub> H <sub>52</sub> O <sub>4</sub>  | 476.3866   |          |
| 2   | ginsenoside F1                       | C <sub>36</sub> H <sub>62</sub> O <sub>9</sub>  | 638.4394   |          |
| 3   | ginsenoside Rh1                      | C <sub>36</sub> H <sub>62</sub> O <sub>9</sub>  | 638.4394   |          |
| 4   | 20( <i>R</i> )-ginsenoside Rh1       | C <sub>36</sub> H <sub>62</sub> O <sub>9</sub>  | 638.4394   |          |
| 5   | Compound I                           | C <sub>38</sub> H <sub>64</sub> O <sub>10</sub> | 680.4499   |          |
| 6   | ginsenoside Rg1                      | C <sub>42</sub> H <sub>72</sub> O <sub>14</sub> | 800.4922   |          |
| 7   | ginsenoside F3                       | C <sub>41</sub> H <sub>70</sub> O <sub>13</sub> | 770.4816   |          |
| 8   | sanchinoside A3                      | C <sub>41</sub> H <sub>70</sub> O <sub>13</sub> | 770.4816   |          |
| 9   | ginsenoside F5                       | C <sub>41</sub> H <sub>70</sub> O <sub>13</sub> | 770.4816   |          |
| 10  | compound II                          | C <sub>41</sub> H <sub>70</sub> O <sub>13</sub> | 770.4816   |          |
| 11  | pseudoginsenoside Rt3                | C <sub>41</sub> H <sub>70</sub> O <sub>13</sub> | 770.4816   |          |
| 12  | notoginsenoside R2                   | C <sub>41</sub> H <sub>70</sub> O <sub>13</sub> | 770.4816   |          |
| 13  | 20( <i>R</i> )-notoginsenoside R2    | C <sub>41</sub> H <sub>70</sub> O <sub>13</sub> | 770.4816   | PPT      |
| 14  | ginsenoside Rg2                      | C <sub>42</sub> H <sub>72</sub> O <sub>13</sub> | 784.4973   |          |
| 15  | notoginsenoside Rt                   | C <sub>44</sub> H <sub>74</sub> O <sub>15</sub> | 842.5028   |          |
| 16  | ginsenoside Rf                       | C <sub>42</sub> H <sub>72</sub> O <sub>14</sub> | 800.4922   |          |
| 17  | notoginsenoside R1                   | C <sub>47</sub> H <sub>80</sub> O <sub>18</sub> | 932.5345   |          |
| 18  | ginsenoside Re                       | C <sub>48</sub> H <sub>82</sub> O <sub>18</sub> | 946.5501   |          |
| 19  | vinaginsenoside R4                   | C <sub>48</sub> H <sub>82</sub> O <sub>18</sub> | 962.5450   |          |
| 20  | 20- <i>O</i> -glucosylginsenoside Rf | C <sub>48</sub> H <sub>82</sub> O <sub>18</sub> | 962.5450   |          |
| 21  | notoginsenoside N                    | C <sub>48</sub> H <sub>82</sub> O <sub>18</sub> | 962.5450   |          |
| 22  | notoginsenoside Fp1                  | C <sub>47</sub> H <sub>80</sub> O <sub>18</sub> | 932.5345   |          |
| 23  | ginsenoside Re2                      | C <sub>48</sub> H <sub>82</sub> O <sub>18</sub> | 962.5450   |          |
| 24  | ginsenoside Re3                      | C <sub>48</sub> H <sub>82</sub> O <sub>18</sub> | 962.5450   |          |
| 25  | malonyl-floralginsenoside Re1        | C <sub>51</sub> H <sub>84</sub> O <sub>21</sub> | 1032.5505  |          |
| 26  | ginsenoside Rh2                      | C <sub>36</sub> H <sub>62</sub> O <sub>8</sub>  | 622.4445   |          |
| 27  | 20( <i>R</i> )-ginsenoside Rh2       | C <sub>36</sub> H <sub>62</sub> O <sub>8</sub>  | 622.4445   |          |
| 28  | compound K                           | C <sub>36</sub> H <sub>62</sub> O <sub>8</sub>  | 622.4445   |          |
| 29  | ginsenoside F2                       | C <sub>42</sub> H <sub>72</sub> O <sub>13</sub> | 784.4973   |          |
| 30  | 20( <i>S</i> )-ginsenoside Rg3       | C <sub>42</sub> H <sub>72</sub> O <sub>13</sub> | 784.4973   |          |
| 31  | 20( <i>R</i> )-ginsenoside Rg3       | C <sub>42</sub> H <sub>72</sub> O <sub>13</sub> | 784.4973   |          |
| 32  | notoginsenoside K                    | C <sub>48</sub> H <sub>82</sub> O <sub>18</sub> | 946.5501   |          |
| 33  | ginsenoside Rd                       | C <sub>48</sub> H <sub>82</sub> O <sub>18</sub> | 946.5501   |          |
| 34  | gypenoside XVII                      | C <sub>48</sub> H <sub>82</sub> O <sub>18</sub> | 946.5501   | PPD      |
| 35  | malonyl-floralginsenoside Rd5        | C <sub>51</sub> H <sub>84</sub> O <sub>21</sub> | 1032.5505  |          |
| 36  | malonyl-ginsenoside Rd               | C <sub>51</sub> H <sub>84</sub> O <sub>21</sub> | 1032.5505  |          |
| 37  | ginsenoside Rb2                      | C <sub>53</sub> H <sub>90</sub> O <sub>22</sub> | 1078.5924  |          |
| 38  | ginsenoside Rb3                      | C <sub>53</sub> H <sub>90</sub> O <sub>22</sub> | 1078.5924  |          |
| 39  | ginsenoside Rc                       | C <sub>53</sub> H <sub>90</sub> O <sub>22</sub> | 1078.5924  |          |
| 40  | ginsenoside Rb1                      | C <sub>54</sub> H <sub>92</sub> O <sub>23</sub> | 1108.6029  |          |
| 41  | malonyl-ginsenoside Rc               | C <sub>56</sub> H <sub>92</sub> O <sub>25</sub> | 1164.5928  |          |

|    |                                      |                                                  |           |        |
|----|--------------------------------------|--------------------------------------------------|-----------|--------|
| 42 | malonyl-ginsenoside Rb2              | C <sub>56</sub> H <sub>92</sub> O <sub>25</sub>  | 1164.5928 |        |
| 43 | malonyl-ginsenoside Rb1              | C <sub>57</sub> H <sub>94</sub> O <sub>26</sub>  | 1194.6033 |        |
| 44 | notoginsenoside R4                   | C <sub>59</sub> H <sub>100</sub> O <sub>27</sub> | 1240.6452 |        |
| 45 | ginsenoside Ra1                      | C <sub>58</sub> H <sub>98</sub> O <sub>26</sub>  | 1210.6346 |        |
| 46 | ginsenoside Ra2                      | C <sub>58</sub> H <sub>98</sub> O <sub>26</sub>  | 1210.6346 |        |
| 47 | notoginsenoside T                    | C <sub>64</sub> H <sub>108</sub> O <sub>31</sub> | 1372.6875 |        |
| 48 | oleanolic acid                       | C <sub>30</sub> H <sub>48</sub> O <sub>3</sub>   | 456.3603  |        |
| 49 | chikusetsusaponin IVa                | C <sub>42</sub> H <sub>66</sub> O <sub>14</sub>  | 794.4453  |        |
| 50 | ginsenoside Ro                       | C <sub>48</sub> H <sub>76</sub> O <sub>19</sub>  | 956.4981  | OA     |
| 51 | chikusetsusaponin IV                 | C <sub>47</sub> H <sub>74</sub> O <sub>18</sub>  | 926.4875  |        |
| 52 | pseudoginsenoside Rt1                | C <sub>47</sub> H <sub>74</sub> O <sub>18</sub>  | 926.4875  |        |
| 53 | 24( <i>R</i> )-pseudoginsenoside Rt5 | C <sub>36</sub> H <sub>62</sub> O <sub>10</sub>  | 654.4343  | OT     |
| 54 | 24( <i>R</i> )-pseudoginsenoside F11 | C <sub>42</sub> H <sub>72</sub> O <sub>14</sub>  | 800.4922  |        |
| 55 | ginsenoside Rk1                      | C <sub>42</sub> H <sub>70</sub> O <sub>12</sub>  | 766.4868  |        |
| 56 | ginsenoside Rg5                      | C <sub>42</sub> H <sub>70</sub> O <sub>12</sub>  | 766.4868  |        |
| 57 | 5,6-didehydroginsenoside Rb1         | C <sub>54</sub> H <sub>90</sub> O <sub>23</sub>  | 1106.5873 | Others |
| 58 | ginsenoside Rk3                      | C <sub>36</sub> H <sub>60</sub> O <sub>8</sub>   | 620.4288  |        |
| 59 | ginsenoside Rh4                      | C <sub>36</sub> H <sub>60</sub> O <sub>8</sub>   | 620.4288  |        |
| 60 | notoginsenoside T5                   | C <sub>41</sub> H <sub>68</sub> O <sub>12</sub>  | 752.4711  |        |

Compound I: 6-*O*- $\beta$ -D-(6'-acetyl)-glucopyranosyl-24-en-dammar-3,6,12,20(*S*)-tetraol;

Compound II: 6-*O*-( $\beta$ -D-glucopyranosyl)-20-*O*-( $\beta$ -D-xylopyranosyl)-3,6 $\alpha$ ,12,20(*S*)-tetrahydroxydammar-24-ene.

**Table S2** Information of the 178 saponins identified in *Panax japonicus* by integrated analyses of the DDA and HDMS<sup>E</sup> data.

| No. | Observed<br>RT (min) | Observed<br><i>m/z</i>   | Formula                                         | Mass error<br>(ppm) | CCS<br>(Å <sup>2</sup> ) | Adducts  | ESI-MS <sup>2</sup>                                                                                        | Identification                                   |
|-----|----------------------|--------------------------|-------------------------------------------------|---------------------|--------------------------|----------|------------------------------------------------------------------------------------------------------------|--------------------------------------------------|
| 1   | 2.35                 | 861.4835                 | C <sub>42</sub> H <sub>72</sub> O <sub>15</sub> | -2.2                | 305.45                   | +HCOO    | 815.5313,653.4333,654.4292,635.4110,5<br>53.3206,491.3715,415.3225,391.2855,38<br>9.2696,113.0251          | (PPT+O)-Glc-Glc                                  |
| 2   | 2.50                 | 863.4999 <sup>e</sup>    | C <sub>42</sub> H <sub>74</sub> O <sub>15</sub> | -1.3                | 306.58                   | +HCOO    | 781.4889,655.4346,493.3906,417.3369,4<br>15.3210,391.2955,222.9747                                         | (PPT+H <sub>2</sub> O)-Glc-Glc                   |
| 3   | 2.56                 | 1007.5417 <sup>e</sup>   | C <sub>48</sub> H <sub>82</sub> O <sub>19</sub> | -1.5                | 333.02                   | +HCOO    | 961.5174,799.4812,781.4759,653.4232,6<br>37.4103,635.4149,491.3750,415.3243,39<br>1.2851,373.2748,113.0248 | OT-Glc-Glc-Rha                                   |
| 4   | 2.67                 | 1023.5363                | C <sub>48</sub> H <sub>82</sub> O <sub>20</sub> | -1.8                | 320.03                   | +HCOO    | 977.5364,815.4852,653.4289,533.3832,4<br>91.3722,415.3218                                                  | OT-Glc-Glc-Glc                                   |
| 5   | 2.84                 | 879.4952                 | C <sub>42</sub> H <sub>74</sub> O <sub>16</sub> | -0.8                | 294.66                   | +HCOO    | 833.4940,671.4375,509.3848,391.2857,1<br>13.0249                                                           | (PPT+O+H <sub>2</sub> O)-Glc-Glc                 |
| 6   | 2.98                 | 993.5266                 | C <sub>47</sub> H <sub>80</sub> O <sub>19</sub> | -1.0                | 317.11                   | +HCOO,-H | 947.5210,815.4776,653.4266,533.3784,4<br>91.3715,415.3214                                                  | OT-Xyl-Glc-Glc (Vinaginsenoside<br>R6 or isomer) |
| 7   | 3.48                 | 1007.5432 <sup>e</sup>   | C <sub>48</sub> H <sub>82</sub> O <sub>19</sub> | -0.1                | 322.82                   | +HCOO    | 961.5424,801.5027,799.4927,653.4297,4<br>91.3693,415.3238,403.3169,113.0246                                | OT-Glc-Rha-Glc                                   |
| 8   | 3.56                 | 849.4849 <sup>b,e+</sup> | C <sub>41</sub> H <sub>72</sub> O <sub>15</sub> | 0.5                 | 292.5                    | +HCOO    | 803.4811,671.4395,509.3850,391.2861,1<br>13.0217                                                           | (PPT+H <sub>2</sub> O+O)-Xyl-Glc                 |
| 9   | 4.10                 | 861.4870                 | C <sub>42</sub> H <sub>72</sub> O <sub>15</sub> | 1.9                 | 295.6                    | +HCOO    | 815.4667,715.4003,653.4090,635.3881,5<br>53.3379,493.3866,491.3762,391.2855                                | (PPT+O)-Glc-Glc                                  |

|    |      |                        |                                                 |      |        |          |                                                                          |                                                                          |
|----|------|------------------------|-------------------------------------------------|------|--------|----------|--------------------------------------------------------------------------|--------------------------------------------------------------------------|
| 10 | 4.53 | 1007.5427              | C <sub>48</sub> H <sub>82</sub> O <sub>19</sub> | -0.6 | 320.5  | +HCOO    | 962.5414,961.5401,799.4857,637.4335,475.3803,391.2857,221.0657           | PPT-Glc-(Glc-Glc)                                                        |
| 11 | 4.72 | 861.4849               | C <sub>42</sub> H <sub>72</sub> O <sub>15</sub> | -0.5 | 296.03 | +HCOO    | 815.4781,653.4304,491.3742,391.2856,389.2701,113.0234                    | (PPT+O)-Glc-Glc                                                          |
| 12 | 4.85 | 1153.6002              | C <sub>54</sub> H <sub>92</sub> O <sub>23</sub> | -0.8 | 339.94 | +HCOO    | 1107.5938,945.5401,799.4826,637.4345,475.3794,391.2865,221.0663          | PPT-Glc-Rha-(Glc-Glc)<br>(Yesanchinoside E or ginsenoside Re8 or isomer) |
| 13 | 4.89 | 861.4853               | C <sub>42</sub> H <sub>72</sub> O <sub>15</sub> | -0.1 | 296.95 | +HCOO    | 815.4814,653.4335,491.3751,391.2860,389.2701,113.0239                    | (PPT+O)-Glc-Glc                                                          |
| 14 | 5.53 | 1007.5426 <sup>a</sup> | C <sub>48</sub> H <sub>82</sub> O <sub>19</sub> | -0.6 | 329.77 | +HCOO,-H | 961.5401,799.4860,637.4330,475.3801,475.3801,391.2859,389.2687,113.0246  | 20- <i>O</i> -Glucosyl-ginsenoside Rf                                    |
| 15 | 5.87 | 977.5311 <sup>a</sup>  | C <sub>47</sub> H <sub>80</sub> O <sub>18</sub> | -1.6 | 317.45 | +HCOO,-H | 932.5561,768.5239,637.4389,553.3368,475.3780,391.2887,191.0559,131.0338  | Notoginsenoside Fp1                                                      |
| 16 | 5.98 | 831.4741               | C <sub>41</sub> H <sub>70</sub> O <sub>14</sub> | -0.8 | 290.01 | +HCOO,-H | 785.4603,653.4278,491.3743,391.2852                                      | (PPT+O)-Xyl-Glc                                                          |
| 17 | 6.10 | 977.5319 <sup>a</sup>  | C <sub>47</sub> H <sub>80</sub> O <sub>18</sub> | -0.8 | 327.97 | +HCOO    | 931.5364,799.4777,637.4313,475.3796,391.2860,113.0243                    | Notoginsenoside R1                                                       |
| 18 | 6.18 | 861.4850 <sup>e</sup>  | C <sub>42</sub> H <sub>72</sub> O <sub>15</sub> | -0.3 | 307.1  | +HCOO    | 815.4804,653.4230,491.3771,415.3240,403.3229,161.0455,113.0245           | OT-Glc-Glc                                                               |
| 19 | 6.22 | 1123.5916              | C <sub>53</sub> H <sub>90</sub> O <sub>22</sub> | 1.0  | 337.87 | +HCOO,-H | 1077.5867,945.5413,783.4976,637.4328,475.3801,391.2864,191.0561,131.0351 | PPT-Xyl-Glc-Rha-Glc                                                      |



|    |      |                        |                                                 |      |                   |          |                                                                                          |                                                               |
|----|------|------------------------|-------------------------------------------------|------|-------------------|----------|------------------------------------------------------------------------------------------|---------------------------------------------------------------|
| 20 | 6.26 | 1007.5439 <sup>a</sup> | C <sub>48</sub> H <sub>82</sub> O <sub>19</sub> | 0.7  | 319.89            | +HCOO    | 961.5399,799.4777,637.4376,475.3819,3<br>91.2868,113.0230                                | Ginsenoside Re2                                               |
| 21 | 7.32 | 845.4904 <sup>a</sup>  | C <sub>42</sub> H <sub>72</sub> O <sub>14</sub> | 0.0  | 301.66            | +HCOO    | 799.4790,637.4331,475.3801,391.2857,3<br>89.2692,113.0247                                | Ginsenoside Rg1                                               |
| 22 | 7.63 | 991.5490 <sup>a</sup>  | C <sub>48</sub> H <sub>82</sub> O <sub>18</sub> | 0.7  | 332.03/261<br>.05 | +HCOO,-H | 945.5420,783.4904,637.4330,475.3797,3<br>91.2856,389.2706,205.0710,113.0247              | Ginsenoside Re                                                |
| 23 | 7.66 | 831.4749               | C <sub>41</sub> H <sub>70</sub> O <sub>14</sub> | 0.2  | 300.07            | +HCOO,-H | 785.4769,653.4229,491.3719,415.3188                                                      | OT-Xyl-Glc                                                    |
| 24 | 8.44 | 1195.6113              | C <sub>56</sub> H <sub>94</sub> O <sub>24</sub> | -0.4 | 345.6             | +HCOO,-H | 1149.6618,1107.6024,945.5489,783.4956<br>,637.4345,475.3816,391.2862,161.0457            | PPT-Glc-Glc-Rha-Glc-Ace.                                      |
| 25 | 8.59 | 1025.5537              | C <sub>48</sub> H <sub>84</sub> O <sub>20</sub> | -0.1 | 339.4             | +HCOO    | 1025.5183,817.4938,799.4868,655.4445,<br>637.4415,493.3900,375.2945,113.0251             | (PPT+H <sub>2</sub> O)-Glc-Glc-Glc                            |
| 26 | 8.64 | 1005.5271              | C <sub>48</sub> H <sub>80</sub> O <sub>19</sub> | -0.4 | 324.21            | +HCOO    | 959.5317,797.4761,635.4142,617.4080,4<br>73.3648,345.2431,331.2279,113.0255              | (7-OH-5-ene-PPD)-Glc-Glc-Glc<br>(Ginsenoside III or isomer)   |
| 27 | 8.72 | 843.4749               | C <sub>42</sub> H <sub>70</sub> O <sub>14</sub> | 0.1  | 300.83            | +HCOO    | 635.4195,636.4166,551.3117,473.3623,3<br>89.2692                                         | (7-OH-5-ene-PPD)-Glc-Glc                                      |
| 28 | 8.83 | 887.5011 <sup>c</sup>  | C <sub>44</sub> H <sub>74</sub> O <sub>15</sub> | 0.1  | 310.72            | +HCOO,-H | 841.4970,637.4281,619.4206,535.3266,4<br>75.3789,457.3671,391.2851,                      | PPT-Ace.-Glc-Glc                                              |
| 29 | 8.95 | 1031.5420              | C <sub>51</sub> H <sub>84</sub> O <sub>21</sub> | -1.2 | 327.68            | -H       | 945.5292,783.4976,637.4315,475.3787,3<br>91.2862,113.0231                                | PPT-Mal.-Glc-Rha-Glc                                          |
| 30 | 8.95 | 1005.5263              | C <sub>48</sub> H <sub>80</sub> O <sub>19</sub> | -1.2 | 336.62            | +HCOO    | 959.5158,797.4652,635.4367,636.4347,4<br>73.3639,389.2709,381.3122,355.2677,11<br>3.0247 | (7-OH-5-ene-PPD)-Glc-Glc-Glc<br>(Notoginsenoside G or isomer) |

|    |      |                          |                                                 |      |        |          |                                                                                              |                                            |
|----|------|--------------------------|-------------------------------------------------|------|--------|----------|----------------------------------------------------------------------------------------------|--------------------------------------------|
| 31 | 9.04 | 831.4752 <sup>e</sup>    | C <sub>41</sub> H <sub>70</sub> O <sub>14</sub> | 0.5  | 289.62 | +HCOO,-H | 785.4732,653.4313,491.3717,415.3201,403.3209                                                 | OT-Xyl-Glc                                 |
| 32 | 9.11 | 1165.5997 <sup>e</sup>   | C <sub>55</sub> H <sub>92</sub> O <sub>23</sub> | -1.2 | 343.64 | +HCOO    | 1119.6060,1078.6024,1077.5510,945.5423,783.4891,637.4396,475.3796,391.2889,191.0562,131.0329 | PPT-Ace.-Xyl-Glc-Rha-Glc                   |
| 33 | 9.12 | 973.4999 <sup>b,e+</sup> | C <sub>48</sub> H <sub>78</sub> O <sub>20</sub> | -1.5 | —      | -H       | 973.4930,811.4465,749.4496,635.4390,677.4314,631.3837,587.3960,541.3920,473.3628,113.0268    | (7-OH-5-ene-PPD)-Glc-GlurA-Glc             |
| 34 | 9.13 | 961.5387 <sup>e</sup>    | C <sub>47</sub> H <sub>80</sub> O <sub>17</sub> | 1.0  | 323.12 | +HCOO,-H | 915.5172,753.4710,607.4208,475.3805,391.2849                                                 | PPT-Glc-Rha-Xyl                            |
| 35 | 9.23 | 1167.5826 <sup>c</sup>   | C <sub>54</sub> H <sub>90</sub> O <sub>24</sub> | 1.9  | 358.62 | +HCOO,-H | 852.3967,587.3933,475.3802,473.3634,391.2850,389.2656,                                       | Notoginsenoside B or isomer                |
| 36 | 9.24 | 1031.5434 <sup>a</sup>   | C <sub>51</sub> H <sub>84</sub> O <sub>21</sub> | 0.2  | —      | -H       | 987.6656,945.5181,783.5231,637.4219,475.3829,391.2833,113.0234                               | Malonyl-floralginsenoside Re1              |
| 37 | 9.41 | 861.7562 <sup>b</sup>    | C <sub>42</sub> H <sub>72</sub> O <sub>15</sub> | 4.2  | 292.96 | +HCOO    | 815.4833,653.4274,491.3767,415.3231,221.0668,161.0464,113.0247                               | OT-(Glc-Glc)                               |
| 38 | 9.44 | 961.5397                 | C <sub>47</sub> H <sub>80</sub> O <sub>17</sub> | 2.0  | —      | -H,+HCOO | 914.3988,915.3973,870.4121,783.4974,707.3456,637.4349,475.3842,391.2904,                     | PPT-Xyl-Rha-Glc                            |
| 39 | 9.45 | 861.4859                 | C <sub>42</sub> H <sub>72</sub> O <sub>15</sub> | 0.7  | 309.2  | +HCOO,-H | 815.4819,653.4290,491.3757,415.3227,403.3225,401.3062,161.0461,113.0245                      | OT-Glc-Glc (Floralginsenoside B or isomer) |

|    |       |                          |                                                 |      |                          |          |                                                                                                                                           |                                        |
|----|-------|--------------------------|-------------------------------------------------|------|--------------------------|----------|-------------------------------------------------------------------------------------------------------------------------------------------|----------------------------------------|
| 40 | 9.50  | 989.5317 <sup>e</sup>    | C <sub>48</sub> H <sub>80</sub> O <sub>18</sub> | -0.9 | 330.73                   | +HCOO    | 943.5617,797.4885,780.4569,763.4728,6<br>35.4227,617.4048,475.3782,473.3555,45<br>5.3687,391.2916,345.2444,331.2373,276.<br>2122,129.0211 | (7-OH-5-ene-PPD)-Rha-Glc-Glc           |
| 41 | 9.53  | 1007.5436                | C <sub>48</sub> H <sub>82</sub> O <sub>19</sub> | 0.4  | 335.1                    | +HCOO,-H | 961.5503,799.4435,781.4798,619.4081,5<br>37.3487,475.4054,391.2888,375.2747,11<br>3.0251                                                  | PPT-Glc-Glc-Glc                        |
| 42 | 9.56  | 887.5011 <sup>e</sup>    | C <sub>44</sub> H <sub>74</sub> O <sub>15</sub> | 0.1  | 307.03                   | +HCOO    | 686.2477,621.2611,620.4196,475.3785,3<br>91.2863                                                                                          | PPT-Glc-Glc-Ace.                       |
| 43 | 9.72  | 1033.5591                | C <sub>50</sub> H <sub>84</sub> O <sub>19</sub> | 0.2  | 339.22                   | -H       | 987.4163,945.5452,783.4920,637.4336,4<br>75.3797,391.2858,113.0244                                                                        | PPT-Ace.-Glc-Rha-Glc                   |
| 44 | 9.75  | 971.4860 <sup>d,e+</sup> | C <sub>48</sub> H <sub>76</sub> O <sub>20</sub> | 0.3  | 322.47/249<br>.56/201.06 | -H       | 971.4892,809.4357,791.4247,521.3631,4<br>71.3516,451.3234,409.3473,113.0239                                                               | (OA+O)-2Glc-GlurA                      |
| 45 | 9.93  | 977.5313                 | C <sub>47</sub> H <sub>80</sub> O <sub>18</sub> | -1.4 | 324.56                   | +HCOO    | 748.4573,649.3142,475.3837,391.2831,3<br>53.1087,245.0592,221.0644,131.0378                                                               | PPT-Glc-Glc-Xyl                        |
| 46 | 10.13 | 831.4754                 | C <sub>41</sub> H <sub>70</sub> O <sub>14</sub> | 0.7  | 301.33                   | +HCOO,-H | 785.4709,653.4280,491.3758,415.3225,4<br>03.3227,161.0459,161.0459,113.0249                                                               | OT-Xyl-Glc                             |
| 47 | 10.27 | 989.5337                 | C <sub>48</sub> H <sub>80</sub> O <sub>18</sub> | 1.0  | 332.62                   | +HCOO    | 943.5271,781.4818,619.4233,527.3795,4<br>57.3718,409.3564,221.0641,161.0455                                                               | Quinquenoside L <sub>1</sub> or isomer |
| 48 | 10.47 | 1015.4756 <sup>b,e</sup> | C <sub>48</sub> H <sub>74</sub> O <sub>20</sub> | 0.05 | —                        | +HCOO    | 969.4722,807.4185,645.3678,627.3552,5<br>37.3592,469.3247,465.3387,423.3258                                                               | (OA+CH <sub>2</sub> )-GlurA-Glc-Glc    |

|    |       |                          |                                                  |      |                          |          |                                                                                                      |                                                            |
|----|-------|--------------------------|--------------------------------------------------|------|--------------------------|----------|------------------------------------------------------------------------------------------------------|------------------------------------------------------------|
| 49 | 10.53 | 845.4907 <sup>a</sup>    | C <sub>42</sub> H <sub>72</sub> O <sub>14</sub>  | 0.3  | 304.52                   | +HCOO    | 799.4873,653.4303,491.3758,415.3224,1<br>61.0463,113.0248                                            | 24(R)-Pseudoginsenoside F11                                |
| 50 | 10.71 | 955.4903 <sup>e</sup>    | C <sub>48</sub> H <sub>76</sub> O <sub>19</sub>  | -0.5 | —                        | -H       | 955.4911,793.4391,631.3964,613.3760,5<br>69.3853,455.3533,437.3428,153.0195                          | OA-GlurA-Glc-Glc                                           |
| 51 | 10.97 | 1285.643 <sup>a</sup>    | C <sub>59</sub> H <sub>100</sub> O <sub>27</sub> | -0.3 | 374.21                   | +HCOO    | 1239.6395,1107.5968,945.5447,783.4910<br>,621.4372,459.3848,353.1092,221.0666,1<br>61.0456           | Notoginsenoside R4                                         |
| 52 | 11.27 | 1117.5439 <sup>e</sup>   | C <sub>54</sub> H <sub>86</sub> O <sub>24</sub>  | 0.2  | 355.99/258<br>.50/217.27 | -H       | 1117.5448,955.4835,793.4387,631.3845,<br>569.3857,523.3806,455.3533,221.0673                         | OA-GlurA-Glc-Glc-Glc                                       |
| 53 | 11.50 | 845.4918 <sup>a</sup>    | C <sub>42</sub> H <sub>72</sub> O <sub>14</sub>  | 1.7  | 311.53                   | +HCOO,-H | 799.4871,637.4340,475.3803,391.2859,3<br>73.2750,113.0247                                            | Ginsenoside Rf                                             |
| 54 | 11.56 | 971.4867 <sup>d,e+</sup> | C <sub>48</sub> H <sub>76</sub> O <sub>20</sub>  | 1    | 329.39                   | -H       | 971.4880,809.4388,747.4339,647.3989,6<br>29.3666,585.3810,471.3496,453.3412                          | (OA+O)-GlurA-Glc-Glc                                       |
| 55 | 11.62 | 1117.5458 <sup>e</sup>   | C <sub>54</sub> H <sub>86</sub> O <sub>24</sub>  | 1.9  | 344.41                   | -H       | 1117.5447,955.4945,793.4380,731.4386,<br>613.3742,569.3861,455.3533                                  | OA-GlurA-Glc-Glc-Glc                                       |
| 56 | 11.75 | 1325.6393                | C <sub>62</sub> H <sub>102</sub> O <sub>30</sub> | 0.7  | 379.14                   | -H       | 1281.6581,1239.6356,1107.5964,945.541<br>7,783.4910,621.4377,459.3856,353.1094,<br>221.0670,161.0458 | PPD-Mal-Xyl-Glc-Glc-(Glc-Glc)<br>(Malony-Iginsenoside Ra3) |
| 57 | 11.87 | 985.5013 <sup>d,e+</sup> | C <sub>49</sub> H <sub>78</sub> O <sub>20</sub>  | -0.1 | 285.23                   | -H       | 985.5047,865.4668,823.4536,791.4221,6<br>46.3740,521.3663,472.3525,451.3220,40<br>9.3461,113.0255    | (OA+O)-GlurA-Glc-GlurA                                     |

|    |       |                          |                                                  |      |        |          |                                                                                                    |                                                        |
|----|-------|--------------------------|--------------------------------------------------|------|--------|----------|----------------------------------------------------------------------------------------------------|--------------------------------------------------------|
| 58 | 11.96 | 1137.6068                | C <sub>54</sub> H <sub>92</sub> O <sub>22</sub>  | 0.5  | 354.47 | +HCOO    | 1091.6037,929.5448,767.4954,605.4447,<br>565.7196,456.3505,161.0461,113.0226                       | (DD-II)-Glc-Glc-Glc-Glc                                |
| 59 | 12.01 | 1327.6522 <sup>c</sup>   | C <sub>61</sub> H <sub>102</sub> O <sub>28</sub> | -1.3 | 387.74 | +HCOO,-H | 1239.6338,1221.6223,621.4346,570.3890<br>,459.3861,375.2902                                        | PPD-Glc-Glc-Glc-Glc-Xyl-Ace                            |
| 60 | 12.03 | 971.4877 <sup>d,e+</sup> | C <sub>48</sub> H <sub>76</sub> O <sub>20</sub>  | 2.0  | —      | -H       | 971.4907,809.4357,767.4491,647.3821,6<br>29.3717,477.3740, 471.3434, 407.3337,<br>337.0736         | (OA+O)-GlurA-Glc-Glc                                   |
| 61 | 12.23 | 1087.5344 <sup>e</sup>   | C <sub>53</sub> H <sub>84</sub> O <sub>23</sub>  | 1.2  | 351.34 | -H       | 955.4969,793.4248,631.3762,569.3858,4<br>55.3543                                                   | OA-GlurA-Xyl-Glc-Glc                                   |
| 62 | 12.34 | 815.4812 <sup>a</sup>    | C <sub>41</sub> H <sub>70</sub> O <sub>13</sub>  | 1.7  | 301.89 | +HCOO,-H | 769.4711,637.4334,475.3803,391.2861                                                                | 20( <i>S</i> )-Notoginsenoside R2 or<br>Ginsenoside F3 |
| 63 | 12.34 | 1087.5343 <sup>b,e</sup> | C <sub>53</sub> H <sub>84</sub> O <sub>23</sub>  | 1.1  | 351.34 | -H       | 1087.5345,955.4630,793.4443,763.4300,<br>631.3923,613.3757,569.3861,497.3661,4<br>55.3661,101.0285 | OA-GlurA-Xyl-Glc-Glc                                   |
| 64 | 12.37 | 769.4761 <sup>a</sup>    | C <sub>41</sub> H <sub>70</sub> O <sub>13</sub>  | 2.3  | —      | -H       | 769.4775,637.4369,475.3818,391.2874                                                                | 20( <i>S</i> )-Notoginsenoside R2 or<br>Ginsenoside F3 |
| 65 | 12.49 | 1153.6026 <sup>a</sup>   | C <sub>54</sub> H <sub>92</sub> O <sub>23</sub>  | 1.2  | 357.7  | +HCOO    | 1107.5968,945.5434,783.4906,621.4368,<br>537.3449,459.3850,375.2910,221.0671                       | Ginsenoside Rb1                                        |
| 66 | 12.69 | 763.4283 <sup>e</sup>    | C <sub>41</sub> H <sub>64</sub> O <sub>13</sub>  | 1.2  | 216.75 | -H       | 763.4175,631.3940,600.3996,569.3882,4<br>97.3656,455.3544                                          | OA-GlurA-Xyl                                           |
| 67 | 12.74 | 1087.5342 <sup>e</sup>   | C <sub>53</sub> H <sub>84</sub> O <sub>23</sub>  | 1.0  | 341.25 | -H       | 1087.5333,955.4714,793.4400,631.3850,<br>613.3756,569.3857,497.3646,455.3547                       | OA-GlurA-Xyl-Glc-Glc                                   |
| 68 | 12.78 | 887.5021                 | C <sub>44</sub> H <sub>74</sub> O <sub>15</sub>  | 1.2  | 320.36 | +HCOO,-H | 841.5033,799.4879,637.4329,475.3808,3                                                              | PPT-Ace.-Glc-Glc                                       |

|    |       |                         |                                                  |     |                   |          |                                                                                              |                                     |
|----|-------|-------------------------|--------------------------------------------------|-----|-------------------|----------|----------------------------------------------------------------------------------------------|-------------------------------------|
|    |       |                         |                                                  |     |                   |          | 91.2865,389.2706,113.0240                                                                    |                                     |
| 69 | 13.16 | 1327.654 <sup>c,e</sup> | C <sub>61</sub> H <sub>102</sub> O <sub>28</sub> | 0   | 384.09            | +HCOO,-H | 1239.6290,1221.6179,783.4856,621.4396<br>,459.3818,<br>969.4767,807.4190,645.3644,627.3537,5 | PPD-Glc-Glc-Glc-Glc-Xyl-Ace.        |
| 70 | 13.24 | 969.4719 <sup>b,e</sup> | C <sub>48</sub> H <sub>74</sub> O <sub>20</sub>  | 1.9 | 326.56            | -H       | 37.3596,469.3348,393.3167,391.3014,11<br>3.0220                                              | (OA+CH <sub>2</sub> )-GlurA-Glc-Glc |
| 71 | 13.25 | 829.4964 <sup>a</sup>   | C <sub>42</sub> H <sub>72</sub> O <sub>13</sub>  | 1.1 | 306.03            | +HCOO,-H | 783.4924,637.4346,475.3805,391.2858                                                          | Ginsenoside Rg2                     |
| 72 | 13.28 | 843.4761                | C <sub>42</sub> H <sub>70</sub> O <sub>14</sub>  | 1.6 | 300.75            | +HCOO    | 797.4691,635.4136,473.3634,443.3570,4<br>27.3229,389.3156,161.0462                           | (7-OH-5-ene-PPD)-Glc-Glc            |
| 73 | 13.34 | 683.4388 <sup>a</sup>   | C <sub>36</sub> H <sub>62</sub> O <sub>9</sub>   | 1.8 | 281.32            | +HCOO,-H | 637.4492,475.3805,391.2867                                                                   | 20(S)-Ginsenoside Rh1               |
| 74 | 13.36 | 955.4924 <sup>e</sup>   | C <sub>48</sub> H <sub>76</sub> O <sub>19</sub>  | 1.6 | 319.27            | -H       | 955.4913,793.4261,631.3875,497.3666,4<br>55.3548                                             | OA-GlurA-Glc-Glc                    |
| 75 | 13.40 | 1117.5449 <sup>e</sup>  | C <sub>54</sub> H <sub>86</sub> O <sub>24</sub>  | 1.2 | 346.66            | -H       | 1117.5477,955.4955,793.4418,631.3931,<br>569.3859,523.3820,455.3543,221.0677,1<br>13.0238    | OA-GlurA-Glc-Glc-Glc                |
| 76 | 13.41 | 829.4970 <sup>e</sup>   | C <sub>42</sub> H <sub>72</sub> O <sub>13</sub>  | 1.8 | —                 | +HCOO,-H | 783.5003,637.4266,475.3789,391.2886,2<br>01.1129                                             | PPT-Rha-Glc                         |
| 77 | 13.43 | 683.4393                | C <sub>36</sub> H <sub>62</sub> O <sub>9</sub>   | 2.5 | —                 | +HCOO    | 476.3868,391.2801,<br>1149.6189,1107.6010,945.5456,783.4897                                  | PPT-Glc                             |
| 78 | 13.47 | 1193.5979 <sup>a</sup>  | C <sub>57</sub> H <sub>94</sub> O <sub>26</sub>  | 1.5 | 355.39/266<br>.72 | -H       | ,621.4383,459.3853,375.2907,221.0669,1<br>61.0460,113.0247                                   | Malonyl-ginsenoside Rb1             |
| 79 | 13.50 | 683.4409                | C <sub>36</sub> H <sub>62</sub> O <sub>9</sub>   | 4.9 | —                 | +HCOO    | 588.3666,475.3926,391.3037                                                                   | PPT-Glc                             |

|    |       |                         |                                                 |     |        |          |                                                                                                            |                                |
|----|-------|-------------------------|-------------------------------------------------|-----|--------|----------|------------------------------------------------------------------------------------------------------------|--------------------------------|
| 80 | 13.57 | 1087.5347 <sup>e</sup>  | C <sub>53</sub> H <sub>84</sub> O <sub>23</sub> | 1.5 | 364.26 | -H       | 1087.5506,955.4888,793.4437,731.4397,<br>631.3785,569.3881,523.3821,455.3536,1<br>13.0232                  | OA-GlurA-Xyl-Glc-Glc           |
| 81 | 13.59 | 955.4921                | C <sub>48</sub> H <sub>76</sub> O <sub>19</sub> | 1.4 | 329.58 | -H       | 955.4935,793.4412,731.4392,659.4184,6<br>31.3882,613.3764,569.3869,455.3544                                | OA-GlurA-Glc-Glc               |
| 82 | 13.61 | 829.4970                | C <sub>42</sub> H <sub>72</sub> O <sub>13</sub> | 1.8 | 309.46 | +HCOO,-H | 783.4966,637.4386,475.3804,391.2864,1<br>13.0267                                                           | PPT-Rha-Glc                    |
| 83 | 13.63 | 1117.5454 <sup>e</sup>  | C <sub>54</sub> H <sub>86</sub> O <sub>24</sub> | 1.6 | 351.06 | -H       | 1117.5493,955.4941,793.4422,631.3896,<br>613.3767,569.3875,455.3547,113.0249                               | OA-GlurA-Glc-Glc-Glc           |
| 84 | 13.84 | 683.4387 <sup>a</sup>   | C <sub>36</sub> H <sub>62</sub> O <sub>9</sub>  | 1.6 | 286    | +HCOO,-H | 637.4387,475.3763,391.2851                                                                                 | 20( <i>R</i> )-Ginsenoside Rh1 |
| 85 | 13.87 | 1195.6144 <sup>e</sup>  | C <sub>56</sub> H <sub>94</sub> O <sub>24</sub> | 2.3 | 372.49 | +HCOO    | 1149.6028,1107.6006,945.5451,783.4878<br>,621.4363,459.3847,375.2909,221.0666,1<br>13.0237                 | PPD-Ace.-Glc-Glc-Glc-Glc       |
| 86 | 13.91 | 989.5342                | C <sub>48</sub> H <sub>80</sub> O <sub>18</sub> | 1.6 | 330.29 | +HCOO    | 943.5373,781.4804,731.4421,619.4149,4<br>57.3692,377.2951,113.0250                                         | (Dehydrated-PPT)-Glc-Glc-Glc   |
| 87 | 13.91 | 955.4910 <sup>b,e</sup> | C <sub>48</sub> H <sub>76</sub> O <sub>19</sub> | 0.2 | 252.25 | -H       | 955.4973,793.4392,731.4414,631.3832,5<br>69.3875,523.3811,455.3540,113.0248                                | OA-GlurA-Glc-Glc               |
| 88 | 13.96 | 887.5021 <sup>e</sup>   | C <sub>44</sub> H <sub>74</sub> O <sub>15</sub> | 1.3 | 312.63 | +HCOO    | 841.4936,799.4854,653.4262,637.4458,6<br>19.4069,491.3802,475.3785,415.3247,39<br>1.2878,331.2203,161.0467 | PPT-Ace.-Glc-Glc               |
| 89 | 14.12 | 1123.5913 <sup>a</sup>  | C <sub>54</sub> H <sub>92</sub> O <sub>24</sub> | 0.7 | 368.79 | +HCOO,-H | 1077.5746,945.5028,783.4871,621.4244,<br>459.3879,191.0590                                                 | Ginsenoside Rb2                |

|    |       |                          |                                                 |      |                          |          |                                                                                                                      |                       |
|----|-------|--------------------------|-------------------------------------------------|------|--------------------------|----------|----------------------------------------------------------------------------------------------------------------------|-----------------------|
| 90 | 14.23 | 955.4918 <sup>e</sup>    | C <sub>48</sub> H <sub>76</sub> O <sub>19</sub> | 1.0  | 334.01/260<br>.21        | -H       | 955.4961,793.4409,749.4517,731.4400,6<br>31.3892,613.3758,569.3859,455.3561,40<br>9.3489,113.0253                    | OA-GlurA-Glc-Glc      |
| 91 | 14.37 | 1087.5332 <sup>e</sup>   | C <sub>53</sub> H <sub>84</sub> O <sub>23</sub> | 0.1  | 368.05/277<br>.04/220.63 | -H       | 1087.5372,955.4902,793.4421,731.4384,<br>631.3824,631.3824,569.3853,455.3534,1<br>13.0242                            | OA-GlurA-Xyl-Glc-Glc  |
| 92 | 14.40 | 1117.5434 <sup>e</sup>   | C <sub>54</sub> H <sub>86</sub> O <sub>24</sub> | -0.2 | 352.16                   | -H       | 1117.5387,955.4923,793.4240,731.4370,<br>713.4285,631.3866,613.3762,569.3862,5<br>23.3794,455.3528,221.0663,113.0234 | OA-GlurA-Glc-Glc-Glc  |
| 93 | 14.46 | 1123.5902 <sup>a</sup>   | C <sub>53</sub> H <sub>90</sub> O <sub>22</sub> | -0.3 | 360.52                   | +HCOO,-H | 1077.5861,945.5433,783.4920,621.4389,<br>459.3844,375.2913,191.0565,113.0249                                         | Ginsenoside Rb3       |
| 94 | 14.58 | 1057.5227                | C <sub>52</sub> H <sub>82</sub> O <sub>22</sub> | 0.2  | 346.61                   | -H       | 1057.5292,925.4803,763.4247,631.3854,<br>613.3757,569.3854,497.3646,455.3539,1<br>13.0253                            | OA-GlurA-Xyl-Glc-Xyl- |
| 95 | 14.83 | 955.4909 <sup>a</sup>    | C <sub>48</sub> H <sub>76</sub> O <sub>19</sub> | 0.1  | 329.02/254<br>.24        | -H       | 955.4905,793.4373,569.3846,455.3529                                                                                  | Ginsenoside Ro        |
| 96 | 14.83 | 1087.5334 <sup>b,e</sup> | C <sub>53</sub> H <sub>84</sub> O <sub>23</sub> | 0.3  | 365.74                   | -H       | 1087.5457,955.4876,793.4329,631.3825,<br>613.3790,569.3876,569.3876,455.3529,1<br>13.0220                            | OA-GlurA-Xyl-Glc-Glc  |
| 97 | 14.86 | 1123.5914                | C <sub>53</sub> H <sub>90</sub> O <sub>22</sub> | 0.7  | 345.16                   | +HCOO    | 1077.5658,945.5368,783.4875,621.4241,<br>459.3777,353.1093,221.0660,131.0353                                         | PPD-Xyl-Glc-Glc-Glc   |
| 98 | 14.86 | 683.4386 <sup>a</sup>    | C <sub>36</sub> H <sub>62</sub> O <sub>9</sub>  | 1.5  | 279.17                   | +HCOO    | 475.3727,391.2890                                                                                                    | Ginsenoside F1        |
| 99 | 15.20 | 1087.5337                | C <sub>53</sub> H <sub>84</sub> O <sub>23</sub> | 0.6  | 369.22/266<br>.58/219.86 | -H       | 1087.5345,925.4816,793.4397,763.4287,<br>731.4377,631.3871,569.3853,551.3746,4                                       | OA-GlurA-Glc-Xyl-Glc  |



|     |       |                          |                                                 |      |        |          |                                                                                                       |                          |
|-----|-------|--------------------------|-------------------------------------------------|------|--------|----------|-------------------------------------------------------------------------------------------------------|--------------------------|
|     |       |                          |                                                 |      |        |          | 55.3534,113.0247                                                                                      |                          |
| 100 | 15.23 | 955.4917                 | C <sub>48</sub> H <sub>76</sub> O <sub>19</sub> | 0.9  | 328.57 | -H       | 955.4917,793.4395,731.4379,631.3862,6<br>13.3748,569.3853,455.3533                                    | OA-GlurA-Glc-Glc         |
| 101 | 15.35 | 725.4490 <sup>c</sup>    | C <sub>38</sub> H <sub>64</sub> O <sub>10</sub> | 1.2  | 288.84 | +HCOO,-H | 661.4249,555.3654,475.3783,401.2676                                                                   | PPT-Glc-Ace.             |
| 102 | 15.36 | 925.4810 <sup>e</sup>    | C <sub>47</sub> H <sub>74</sub> O <sub>18</sub> | 0.9  | —      | -H       | 925.4819,793.4446,631.3861,569.3852,4<br>55.3537,113.0266                                             | OA-GlurA-Xyl-Glc         |
| 103 | 15.37 | 1195.6141                | C <sub>56</sub> H <sub>94</sub> O <sub>24</sub> | 2.0  | 363.72 | +HCOO    | 1150.6208,1149.5755,1107.6069,1089.59<br>15,945.5308,783.4867,621.4402,459.386<br>5,375.2923,221.0678 | PPD-Ace.-Glc-Glc-Glc-Glc |
| 104 | 15.40 | 1087.5331 <sup>b,e</sup> | C <sub>53</sub> H <sub>84</sub> O <sub>23</sub> | 0.04 | —      | -H       | 1087.5277,955.4698,793.4313,631.3861,<br>569.3811,551.3762,455.3522,221.0724                          | OA-GlurA-Xyl-Glc-Glc     |
| 105 | 15.49 | 1057.5226 <sup>e</sup>   | C <sub>52</sub> H <sub>82</sub> O <sub>22</sub> | 0.1  | 358.15 | -H       | 1057.5283,925.4730,793.4351,631.4031,<br>523.3814,455.3534,113.0252                                   | OA-GlurA-Xyl-Xyl-Glc     |
| 106 | 15.52 | 955.4909 <sup>e</sup>    | C <sub>48</sub> H <sub>76</sub> O <sub>19</sub> | 0.1  | 259.96 | -H       | 955.4916,793.4384,631.3859,613.3745,5<br>69.3856,455.3534,113.0251                                    | OA-GlurA-Glc-Glc         |
| 107 | 15.58 | 1163.5849                | C <sub>56</sub> H <sub>92</sub> O <sub>25</sub> | -0.5 | 356.92 | -H       | 1119.6012,1077.5905,945.5446,783.4911<br>,621.4356,459.3803,375.2923,113.0248                         | PPD-Mal.-Glc-Ara-Glc-Glc |
| 108 | 15.60 | 925.4804 <sup>e</sup>    | C <sub>47</sub> H <sub>74</sub> O <sub>18</sub> | 0.2  | —      | -H       | 925.4957,793.4412,631.3911,613.3753,5<br>69.3859,497.3636,455.3542                                    | OA-GlurA-Xyl-Glc         |

|     |       |                         |                                                 |      |                          |          |                                                                                           |                       |
|-----|-------|-------------------------|-------------------------------------------------|------|--------------------------|----------|-------------------------------------------------------------------------------------------|-----------------------|
| 109 | 15.74 | 955.4901 <sup>e</sup>   | C <sub>48</sub> H <sub>76</sub> O <sub>19</sub> | -0.8 | 337.3                    | -H       | 955.4914,793.4381,731.4409,631.3839,6<br>13.3750,569.3863,523.3793,455.3546,11<br>3.0240  | OA-GlurA-Glc-Glc      |
| 110 | 15.85 | 925.4798 <sup>e</sup>   | C <sub>47</sub> H <sub>74</sub> O <sub>18</sub> | -0.5 | —                        | -H       | 925.4807,763.4270,631.4151,613.3747,5<br>69.3854,455.3531,113.0247                        | OA-GlurA-Glc-Xyl      |
| 111 | 15.85 | 955.4902 <sup>b,e</sup> | C <sub>48</sub> H <sub>76</sub> O <sub>19</sub> | -0.6 | —                        | -H       | 955.4944,793.4398,731.4355,631.3731,6<br>13.3753,569.3852,523.3817,455.3525               | OA GlurA-Glc-Glc-     |
| 112 | 15.94 | 939.4953                | C <sub>48</sub> H <sub>76</sub> O <sub>18</sub> | -0.6 | 327.02/253<br>.05/205.44 | -H       | 925.4712,763.4339,631.3818,613.3755,5<br>69.3853,497.3644,455.3547                        | OA-GlurA-Xyl-Glc      |
| 113 | 15.94 | 1057.5229 <sup>e</sup>  | C <sub>52</sub> H <sub>82</sub> O <sub>22</sub> | 0.4  | 355.59                   | -H,+HCOO | 1057.5293,895.4679,763.4443,701.4243,<br>601.5267,587.3937,569.3869,455.3514,1<br>13.0249 | OA-GlurA-Glc-Xyl -Xyl |
| 114 | 15.94 | 925.4807 <sup>b,e</sup> | C <sub>47</sub> H <sub>74</sub> O <sub>18</sub> | 0.5  | —                        | -H       | 925.4808,793.4274,763.4253,701.4258,6<br>31.3937,613.3754,569.3847,455.3539               | OA-GlurA-Xyl-Glc      |
| 115 | 15.94 | 955.4905 <sup>e</sup>   | C <sub>48</sub> H <sub>76</sub> O <sub>19</sub> | -0.3 | —                        | -H       | 955.4922,793.4413,731.4374,631.3832,6<br>13.3756,569.3865,523.3808,455.3529,11<br>3.0251  | OA-GlurA-Glc-Glc      |
| 116 | 16.09 | 991.5467 <sup>a</sup>   | C <sub>48</sub> H <sub>82</sub> O <sub>18</sub> | -1.6 | 336.69                   | +HCOO,-H | 945.5457,783.4865,621.4379,537.3429,4<br>59.3841,375.2902,373.2750,221.0666,11<br>3.0243  | Ginsenoside Rd        |

|     |       |                           |                                                 |      |                   |    |                                                                                                   |                        |
|-----|-------|---------------------------|-------------------------------------------------|------|-------------------|----|---------------------------------------------------------------------------------------------------|------------------------|
| 117 | 16.16 | 941.5097                  | C <sub>48</sub> H <sub>78</sub> O <sub>18</sub> | -1.9 | 335.24            | -H | 941.5074,793.4395,779.4754,731.4376,6<br>15.3722,613.3815,569.3825,455.3712,43<br>9.3663,113.0240 | OA-Glc-Glc-Glc         |
| 118 | 16.18 | 955.4894 <sup>e</sup>     | C <sub>48</sub> H <sub>76</sub> O <sub>19</sub> | -1.5 | 253.87            | -H | 955.4893,793.4390,731.4377,631.3857,6<br>59.4163,613.3748,569.3847,523.3802,45<br>5.3530,113.0241 | OA-GlurA-Glc-Glc       |
| 119 | 16.36 | 925.4808 <sup>c</sup>     | C <sub>47</sub> H <sub>74</sub> O <sub>18</sub> | 0.6  | 325.17/251<br>.25 | -H | 925.4800,763.4270,613.3741,497.3634,4<br>55.3528                                                  | OA-GlurA-Xyl-Glc       |
| 120 | 16.38 | 939.4938                  | C <sub>48</sub> H <sub>76</sub> O <sub>18</sub> | -2.2 | 327.27            | -H | 939.4965,777.4427,715.4431,631.3789,6<br>13.3751,569.3849,455.3520,113.0265                       | OA-GlurA-Glc-Rha       |
| 121 | 16.41 | 793.4377 <sup>e</sup>     | C <sub>42</sub> H <sub>66</sub> O <sub>14</sub> | -0.3 | —                 | -H | 793.4432,631.3871,569.3877,455.3527,1<br>13.0227                                                  | OA-GlurA-Glc           |
| 122 | 16.57 | 925.4791 <sup>a</sup>     | C <sub>47</sub> H <sub>74</sub> O <sub>18</sub> | -1.2 | —                 | -H | 925.4800,763.4271,569.3844,455.3527,1<br>13.0244                                                  | Pseudoginsenoside Rt1  |
| 123 | 16.77 | 925.4803 <sup>c</sup>     | C <sub>47</sub> H <sub>74</sub> O <sub>18</sub> | -0.1 | 329.71/249<br>.93 | -H | 925.4789,793.4376,613.3738,497.3634,4<br>55.3529,                                                 | OA-GlurA-Xyl-Glc       |
| 124 | 16.90 | 925.4803 <sup>c,e</sup>   | C <sub>47</sub> H <sub>74</sub> O <sub>18</sub> | -0.1 | —                 | -H | 925.4789,731.4357,613.3738,497.3633,4<br>55.3528,                                                 | OA-GlurA-Xyl-Glc       |
| 125 | 17.07 | 1041.4899 <sup>b,e+</sup> | C <sub>51</sub> H <sub>78</sub> O <sub>22</sub> | -1.3 | —                 | -H | 997.4990,835.4502,659.4149,569.3848,4<br>97.3632,455.3535                                         | OA-GlurA-Mal-Glc-Glc   |
| 126 | 17.12 | 997.5006 <sup>b,e+</sup>  | C <sub>50</sub> H <sub>78</sub> O <sub>20</sub> | -0.8 | —                 | -H | 997.4991,835.4495,659.4238,569.3867,4<br>97.3636,455.3541,113.0275                                | OA-GlurA-Ace.-Glc -Glc |

|     |       |                          |                                                 |      |               |          |                                                                                  |                        |
|-----|-------|--------------------------|-------------------------------------------------|------|---------------|----------|----------------------------------------------------------------------------------|------------------------|
| 127 | 17.26 | 925.4793 <sup>a</sup>    | C <sub>47</sub> H <sub>74</sub> O <sub>18</sub> | -1.0 | 330.41        | -H       | 925.4809,763.4269,569.3844,497.3637,455.3531                                     | Chikusetsusaponin IV   |
| 128 | 17.39 | 1033.5561 <sup>c</sup>   | C <sub>50</sub> H <sub>84</sub> O <sub>19</sub> | -2.7 | 346.21        | +HCOO,-H | 945.5412,783.4860,621.4367,538.3502,441.3727,376.2931                            | PPD-3Glc-Ace.          |
| 129 | 17.41 | 1031.543 <sup>a</sup>    | C <sub>51</sub> H <sub>84</sub> O <sub>21</sub> | -0.2 | 344.4         | -H       | 987.5768,945.5436,783.4899,621.4377,459.3846,375.2913,161.0448,113.0249          | Malonyl-ginsenoside Rd |
| 130 | 17.51 | 1031.5407                | C <sub>51</sub> H <sub>84</sub> O <sub>21</sub> | -2.4 | —             | -H       | 998.4588,988.5671,946.5313,621.4335,569.3801,459.3676,375.2884,113.0242          | PPD-Mal.-Glc-Glc-Glc   |
| 131 | 17.51 | 997.5000 <sup>b,e+</sup> | C <sub>50</sub> H <sub>78</sub> O <sub>20</sub> | -1.4 | 247.46        | -H       | 997.5015,835.4480,659.4171,613.3736,569.3842,497.3646,455.3530,113.0235          | OA-GlurA -Ace.-Glc-Glc |
| 132 | 17.56 | 939.4946                 | C <sub>48</sub> H <sub>76</sub> O <sub>18</sub> | -1.3 | 322.1         | -H       | 939.4987,777.4439,715.4427,643.4202,631.3714,613.3742,569.3841,455.3530,113.0256 | OA-GlurA-Glc-Rha       |
| 133 | 17.57 | 991.5471 <sup>a</sup>    | C <sub>48</sub> H <sub>82</sub> O <sub>18</sub> | -1.3 | 327.85        | +HCOO    | 945.5342,783.4998,621.4371,459.3684,375.2955                                     | Notoginsenoside K      |
| 134 | 17.66 | 925.479 <sup>e</sup>     | C <sub>47</sub> H <sub>74</sub> O <sub>18</sub> | -1.3 | —             | -H       | 925.4676,793.4386,631.3854,613.3725,569.3843,497.3634,455.3531                   | OA-GlurA-Xyl-Glc       |
| 135 | 17.84 | 793.4371 <sup>a</sup>    | C <sub>42</sub> H <sub>66</sub> O <sub>14</sub> | -1.2 | 289.49/223.81 | -H       | 793.4368,631.3841,569.3841,455.3524                                              | Chikusetsusaponin IVa  |

|     |       |                          |                                                 |      |        |       |                                                                             |                        |
|-----|-------|--------------------------|-------------------------------------------------|------|--------|-------|-----------------------------------------------------------------------------|------------------------|
| 136 | 18.14 | 1031.5423                | C <sub>51</sub> H <sub>84</sub> O <sub>21</sub> | -0.9 | 327.05 | -H    | 987.5468,945.5412,783.4890,621.4376,4<br>59.3836,375.2891,161.0476,113.0244 | PPD-Mal.-Glc-Glc-Glc   |
| 137 | 18.16 | 997.5019 <sup>b,e+</sup> | C <sub>50</sub> H <sub>78</sub> O <sub>20</sub> | 0.53 | —      | -H    | 997.5147,835.4419,659.4222,569.3858,4<br>97.3631,455.3509,113.0240          | OA-GlurA-Ace.-Glc -Glc |
| 138 | 18.21 | 871.5069 <sup>c</sup>    | C <sub>44</sub> H <sub>74</sub> O <sub>14</sub> | 1.0  | 313.57 | +HCOO | 614.3776,527.3748,475.3792,391.2855                                         | PPT-Glc-Rha-Ace.       |
| 139 | 18.42 | 997.5003 <sup>b,e+</sup> | C <sub>50</sub> H <sub>78</sub> O <sub>20</sub> | -1.1 | 338.39 | -H    | 997.4951,835.4479,659.4148,569.3856,4<br>97.3647                            | OA-GlurA-Ace.-Glc -Glc |
| 140 | 18.48 | 793.4374                 | C <sub>42</sub> H <sub>66</sub> O <sub>14</sub> | -0.8 | 292.09 | -H    | 793.4378,631.3850,569.3847,497.3641,4<br>55.3530,113.0248                   | OA-GlurA-Glc           |
| 141 | 18.83 | 997.4996 <sup>b,e+</sup> | C <sub>50</sub> H <sub>78</sub> O <sub>20</sub> | -1.8 | 338.39 | -H    | 997.5023,835.4476,659.4172,497.3653,4<br>55.3530,113.0249                   | OA-GlurA-Ace.-Glc -Glc |
| 142 | 18.88 | 925.4800 <sup>b,e</sup>  | C <sub>47</sub> H <sub>74</sub> O <sub>18</sub> | -0.3 | 337.6  | -H    | 925.4789,793.4395,631.3994,613.3799,5<br>69.3850,497.3646,455.3532,113.0255 | OA-GlurA-Xyl-Glc       |
| 143 | 18.96 | 793.4380 <sup>e</sup>    | C <sub>42</sub> H <sub>66</sub> O <sub>14</sub> | 0.1  | —      | -H    | 793.4380,631.3857,569.3858,497.3636,4<br>55.3545,113.0241                   | OA-GlurA-Glc           |
| 144 | 19.12 | 793.4376 <sup>e</sup>    | C <sub>42</sub> H <sub>66</sub> O <sub>14</sub> | -0.5 | 293.84 | -H    | 793.4348,631.3850,569.3846,455.3536,1<br>13.0258                            | OA-GlurA-Glc           |

|     |       |                           |                                                 |      |        |          |                                                                                          |                                                                           |
|-----|-------|---------------------------|-------------------------------------------------|------|--------|----------|------------------------------------------------------------------------------------------|---------------------------------------------------------------------------|
| 145 | 19.19 | 827.4797                  | C <sub>42</sub> H <sub>70</sub> O <sub>13</sub> | -0.2 | 316.1  | +HCOO,-H | 781.4487,619.4473,457.3882,101.0219                                                      | (Dehydrated-PPT)-Glc-Glc                                                  |
| 146 | 19.23 | 1031.5427                 | C <sub>51</sub> H <sub>84</sub> O <sub>21</sub> | -0.5 | 341.37 | -H       | 945.5580,783.4825,621.4403,459.3834,3<br>75.2915,113.0248                                | PPD-Mal.-Glc-Glc-Glc                                                      |
| 147 | 19.24 | 1117.5434                 | C <sub>54</sub> H <sub>86</sub> O <sub>24</sub> | -0.2 | 339.93 | -H       | 998.4415,945.5410,927.5246,783.5043,6<br>21.4355,569.3769,459.3866,375.2889,11<br>3.0203 | PPD-Mal.-Mal.-Glc-Glc-Glc<br>(Malonyl-floralginsenoside Rd6 or<br>isomer) |
| 148 | 19.26 | 1015.5120                 | C <sub>49</sub> H <sub>78</sub> O <sub>19</sub> | 0.1  | 330.16 | +HCOO    | 969.3931,807.4578,627.3911,537.3590,4<br>55.3539,153.0191                                | Chikusetsusaponin V methyl ester<br>or isomer                             |
| 149 | 19.27 | 961.5386                  | C <sub>47</sub> H <sub>80</sub> O <sub>17</sub> | 0.9  | 328.02 | +HCOO,-H | 915.5304,783.4933,621.4372,537.3540,4<br>59.3824,375.2924,131.0346                       | PPD-Xyl-Glc-Glc                                                           |
| 150 | 19.30 | 1033.5571                 | C <sub>50</sub> H <sub>84</sub> O <sub>19</sub> | -1.7 | 342.49 | +HCOO    | 987.5504,945.5420,783.4794,621.4328,4<br>59.3841,375.2892,161.0453                       | PPD-Ace.-Glc-Glc-Glc                                                      |
| 151 | 19.35 | 997.5008 <sup>b,e+</sup>  | C <sub>50</sub> H <sub>78</sub> O <sub>20</sub> | -0.6 | 338.39 | -H       | 997.5018,835.4514,659.4182,569.3847,4<br>97.3647,455.3532,113.0247                       | OA-GlurA-Ace.-Glc -Glc                                                    |
| 152 | 19.35 | 1031.5420                 | C <sub>51</sub> H <sub>84</sub> O <sub>21</sub> | -1.2 | 343.01 | -H       | 987.5566,945.5679,783.4898,621.4122,4<br>59.3883,375.2875                                | PPD-Mal.-Glc-Glc-Glc                                                      |
| 153 | 19.36 | 1129.5437 <sup>b,e+</sup> | C <sub>55</sub> H <sub>86</sub> O <sub>24</sub> | 0.1  | 391.04 | -H       | 1129.5465,997.5039,835.4324,659.4204,<br>497.3639,455.3528,113.0260,                     | OA-GlurA-Ace.-Xyl-Glc -Glc                                                |
| 154 | 19.38 | 763.4276 <sup>e</sup>     | C <sub>41</sub> H <sub>64</sub> O <sub>13</sub> | 0.3  | —      | -H       | 763.3987,587.4076,569.3833,497.3655,4<br>55.3561                                         | OA-GlurA-Xyl                                                              |

|     |       |                         |                                                 |      |        |          |                                                                             |                                                                     |
|-----|-------|-------------------------|-------------------------------------------------|------|--------|----------|-----------------------------------------------------------------------------|---------------------------------------------------------------------|
| 155 | 19.43 | 939.4929                | C <sub>48</sub> H <sub>76</sub> O <sub>18</sub> | -3.2 | 350.02 | -H       | 939.4892,793.4322,631.3816,613.3766,5<br>69.3874,455.3499                   | OA-GlurA-Rha-Glc                                                    |
| 156 | 19.50 | 1029.5273 <sup>e</sup>  | C <sub>50</sub> H <sub>80</sub> O <sub>19</sub> | -0.2 | 334.77 | +HCOO    | 983.4504,821.4717,641.4058,537.3583,4<br>55.3527,437.3423                   | Chikusetsusaponin V ethyl ester or<br>isomer                        |
| 157 | 19.55 | 811.4843                | C <sub>42</sub> H <sub>70</sub> O <sub>12</sub> | -0.8 | 309.85 | +HCOO,-H | 765.4634,619.4137,527.3779,457.3667,4<br>37.3394,113.0248                   | (Dehydrated-PPT)-Rha-Glc                                            |
| 158 | 19.6  | 853.4593                | C <sub>43</sub> H <sub>68</sub> O <sub>14</sub> | 0.2  | 325.32 | +HCOO    | 645.3990,569.3922,455.3578                                                  | Chikusetsusaponin IVa methyl ester<br>or spinasaponinA methyl ester |
| 159 | 19.79 | 829.4950 <sup>a</sup>   | C <sub>42</sub> H <sub>72</sub> O <sub>13</sub> | -0.6 | 308.54 | +HCOO,-H | 783.4881,621.4439,537.3477,459.3847,3<br>75.2895                            | 20( <i>S</i> )-Ginsenoside Rg3 or<br>20( <i>R</i> )-Ginsenoside Rg3 |
| 160 | 19.87 | 853.4946                | C <sub>44</sub> H <sub>72</sub> O <sub>13</sub> | -1.0 | 314.01 | +HCOO    | 807.4884,765.4798,619.3965,457.3638                                         | Ginsenoside Rs5 or isomer                                           |
| 161 | 19.98 | 811.4846                | C <sub>42</sub> H <sub>70</sub> O <sub>12</sub> | -0.4 | 315.84 | +HCOO    | 765.4807,603.4317,439.3624,216.9875,1<br>13.0246                            | Isomer of ginsenoside Rg5                                           |
| 162 | 20.03 | 925.4798 <sup>e</sup>   | C <sub>47</sub> H <sub>74</sub> O <sub>18</sub> | -0.5 | —      | -H       | 925.4782,793.4405,631.3873,613.3738,5<br>69.3855,551.3747,455.3531,113.0238 | OA-GlurA-Xyl-Glc                                                    |
| 163 | 20.07 | 955.4904 <sup>e</sup>   | C <sub>48</sub> H <sub>76</sub> O <sub>19</sub> | -0.4 | —      | -H       | 955.4923,793.4389,659.4178,631.3881,6<br>13.3739,569.3846,523.3796,455.3532 | OA-GlurA-Glc-Glc                                                    |
| 164 | 20.08 | 925.4801 <sup>b,e</sup> | C <sub>47</sub> H <sub>74</sub> O <sub>18</sub> | -0.2 | —      | -H       | 925.4955,793.4084,631.3908,569.3843,4<br>97.3636,455.3531                   | OA-GlurA-Xyl-Glc                                                    |

|     |       |                       |                                                  |      |        |          |                                                                                            |                                                 |
|-----|-------|-----------------------|--------------------------------------------------|------|--------|----------|--------------------------------------------------------------------------------------------|-------------------------------------------------|
| 165 | 20.09 | 1261.6722             | C <sub>65</sub> H <sub>100</sub> O <sub>21</sub> | -1.4 | 377.54 | +HCOO    | 1153.7508,1037.6027,955.4882,793.4400<br>,613.3733,569.3845,455.3536,317.1719,1<br>13.0262 | Polyacetyleneginsenoside Ro                     |
| 166 | 20.09 | 1231.6626             | C <sub>64</sub> H <sub>98</sub> O <sub>20</sub>  | -0.6 | 363.04 | +HCOO    | 1177.1316,925.4805,753.4965,613.3749,<br>569.3847,497.3639,455.3539                        | Baisanqisaponin B                               |
| 167 | 20.15 | 793.4382 <sup>e</sup> | C <sub>42</sub> H <sub>66</sub> O <sub>14</sub>  | 0.3  | 310.56 | -H       | 793.4374,631.3866,613.3747,569.3854,4<br>53.3376,455.3525,437.3434,113.0244                | OA-GlurA-Glc                                    |
| 168 | 20.24 | 811.4844 <sup>a</sup> | C <sub>42</sub> H <sub>70</sub> O <sub>12</sub>  | -0.6 | 317.05 | +HCOO,-H | 765.4790,603.4299,412.9850,279.2314,1<br>61.0458,101.0258                                  | Ginsenoside Rg5                                 |
| 169 | 20.29 | 925.4804 <sup>e</sup> | C <sub>47</sub> H <sub>74</sub> O <sub>18</sub>  | 0.2  | 344.65 | -H       | 925.4922,793.4500,631.3925,613.3739,5<br>69.3862,455.3378,453.3378                         | OA-GlurA-Xyl-Glc                                |
| 170 | 20.34 | 853.4938              | C <sub>44</sub> H <sub>72</sub> O <sub>13</sub>  | -2.0 | 323.98 | +HCOO    | 807.4909,765.4792,747.4735,603.4592,4<br>55.3496                                           | Chikusetsusaponin IVa methyl ester<br>or isomer |
| 171 | 20.35 | 663.4117              | C <sub>36</sub> H <sub>58</sub> O <sub>8</sub>   | 0.5  | 274.01 | +HCOO    | 617.0089,587.0176,455.3535                                                                 | OA-Glc                                          |
| 172 | 20.46 | 763.4285 <sup>e</sup> | C <sub>41</sub> H <sub>64</sub> O <sub>13</sub>  | 1.4  | —      | -H       | 763.4204,631.3832,613.3760,569.3866,4<br>55.3504                                           | OA-GlurA-Xyl                                    |
| 173 | 20.72 | 925.4805 <sup>e</sup> | C <sub>47</sub> H <sub>74</sub> O <sub>18</sub>  | 0.3  | 312.93 | -H       | 925.4961,793.4306,731.4385,569.3848,5<br>51.3742,455.3530                                  | OA-GlurA-Xyl-Glc                                |
| 174 | 20.86 | 777.4445              | C <sub>42</sub> H <sub>66</sub> O <sub>13</sub>  | 1.9  | 309.79 | -H       | 777.4525,616.4114,507.3856,437.3401                                                        | Bipinoside A or isomer                          |



|     |       |                          |                                                 |     |        |    |                                                       |                |
|-----|-------|--------------------------|-------------------------------------------------|-----|--------|----|-------------------------------------------------------|----------------|
| 175 | 20.99 | 763.4279                 | C <sub>41</sub> H <sub>64</sub> O <sub>13</sub> | 0.6 | 313.25 | -H | 763.4530,631.3870,569.3853,497.3645,455.3535,116.9291 | OA-GlurA-Xyl   |
| 176 | 21.12 | 631.3855 <sup>b,e+</sup> | C <sub>36</sub> H <sub>56</sub> O <sub>9</sub>  | 0.5 | 275.40 | -H | 631.3859,455.3536                                     | OA-GlurA       |
| 177 | 21.28 | 763.4281 <sup>e</sup>    | C <sub>41</sub> H <sub>64</sub> O <sub>13</sub> | 0.9 | —      | -H | 764.4292,569.3854,497.3651,455.3534                   | OA-GlurA-Xyl   |
| 178 | 24.23 | 455.3540 <sup>b,e</sup>  | C <sub>30</sub> H <sub>48</sub> O <sub>3</sub>  | 2.0 | 228.32 | -H | 455.3536,407.3332,240.9894                            | Oleanolic acid |

<sup>a</sup>: components identified by comparison with the reference compounds;

<sup>b</sup>: components identified in the “Unknown Components” based on the DDA data;

<sup>c</sup>: components characterized based on the HDMS<sup>E</sup> data;

<sup>d</sup>: components with unknown masses, but listed in the “Identified Components” based on the DDA data due to being identified as the FA-adducts of known components;

<sup>e</sup>: the compounds that may have not been isolated from the *Panax* genus;

<sup>e+</sup>: the compounds with unknown masses that are not included in the in-house database.
